# Supplementary material for: Canonical Cortical Circuit Model Explains Rivalry, Intermittent Rivalry, and Rivalry Memory
Source: PubMed Central journal article supplement (PMC4854419; doi:10.1371/journal.pcbi.1004903), 2016-05-03
Supplement: pcbi.1004903.s001.pdf [file pcbi.1004903.s001.pdf]

## Supplementary Information: Mathematical Analysis

We establish some mathematical conditions for when 1) mutual-inhibition induced topological memory, 2) intermittent rivalry, 3) dominance time dependence on frame presentation period, and 4) slow habituation effect will arise in the rivalry model for  $i = 1, 2$ :

$$\tau_u \frac{du_i}{dt} = -u_i + f(S(t) - \beta s_j u_j - \gamma a_i) \quad (1)$$

$$\tau_a \frac{da_i}{dt} = -a_i + u_i \quad (2)$$

$$\tau_s \frac{ds_i}{dt} = 1 - s_i - \phi u_i s_i \quad (3)$$

where  $f(x) = 0$  for  $x \leq 0$  and it is a monotonically increasing continuous function for  $x > 0$ .  $f(x)$  is differentiable everywhere except possibly at  $x = 0$ . Note that this is still general because we can always shift the threshold to zero by shifting  $x$ .  $S(t)$  oscillates between an off-state  $S_{\text{off}} > 0$  for time  $T_{\text{off}}$  and an on-state  $S_{\text{on}} > S_{\text{off}}$  for time  $T_{\text{on}}$ , with a period of  $T = T_{\text{on}} + T_{\text{off}}$ . The initial conditions satisfy  $0 < u_i(0) < f(S_{\text{on}})$ ,  $0 \leq a_i(0) < f(S_{\text{on}})$ , and  $0 < s(0) \leq 1$ .

Topological memory requires that there exists a winner-take-all (WTA) fixed point where one population is active while the other is silent in both the off-state and the on-state. The fixed point obeys

$$u_i^0 = f(S_{\text{off/on}} - \beta s_j u_j^0 - \gamma a_i) \quad (4)$$

for fixed  $a_i$  and  $s_j$ . The WTA fixed point consists of a state where the activity of one pool is zero while the other is nonzero. Without loss of generality, let us choose  $u_1^0 > 0$  and  $u_2^0 = 0$ . Topological memory implies the existence of a WTA fixed point for a wide range of inputs satisfying the conditions:

$$u_1^0 = f(S - \gamma a_1) \quad (5)$$

$$u_2^0 = 0 \quad (6)$$

The existence condition requires  $S > \gamma a_1$ ,  $S - \beta s_1 u_1^0 - \gamma a_2 < 0$ . Hence, topological memory is possible if

$$\beta s_1 u_1^0 + \gamma a_2 > S > \gamma a_1 \quad (7)$$

**Theorem 1.** *In the absence of fatigue ( $s_i = 1$  and  $a_i = 0$ ), for  $S$  on any finite interval  $\Omega = [r_1, r_2]$ ,  $r_2 > r_1 > 0$ , there is a  $\beta > 0$  such that topological memory exists.*

*Proof.* Without fatigue, the existence condition for topological memory is  $\beta f(S) > S > 0$ . Hence,  $S$  must be positive by the lower bound condition. Since  $f(S)$  is positive and continuous by definition for  $S > 0$ ,  $S/f(S)$  is bounded and continuous and the upper bound condition can be written as  $\beta > S/f(S)$ . Now pick an interval  $\Omega$ . Since  $S/f(S)$  is continuous and bounded there is a supremum  $C$  on the interval. Taking  $\beta > C$  satisfies  $\beta > S/f(S)$  as required.  $\square$

**Theorem 2.** *If the fixed point is WTA for  $S = S_{\text{on}}$  then it is also WTA for  $S = S_{\text{off}} < S_{\text{on}}$  if  $f$  is concave on  $S > 0$  (e.g.  $f'' < 0$ ).*

*Proof.* The WTA fixed point for  $S(t) = S_{\text{on}}$  satisfies  $\beta f(S_{\text{on}}) > S_{\text{on}} > 0$ . Hence,  $\beta > S_{\text{on}}/f(S_{\text{on}})$  since  $f(S_{\text{on}}) > 0$ . We must show that this implies  $\beta f(S_{\text{off}}) > S_{\text{off}} > 0$ . The lower bound is satisfied by the definition of  $S_{\text{off}}$ . The upper bound requires  $\beta > S_{\text{off}}/f(S_{\text{off}})$ . Because  $f$  is concave then  $f(tS) \geq (1-t)f(0) + tf(S) = tf(S)$ ,  $t \in [0, 1]$ , since  $f(0) = 0$  by definition. Let  $S_{\text{off}} = tS_{\text{on}}$ . Then  $S_{\text{off}}/f(S_{\text{off}}) = tS_{\text{on}}/f(tS_{\text{on}}) \leq S_{\text{on}}/f(S_{\text{on}}) < \beta$  by concavity, which proves the proposition.  $\square$

**Corollary 1.** *Topological memory can persist with nonzero fatigue ( $a > 0, s < 1$ ) for some choice of  $S_{\text{off}}$ ,  $S_{\text{on}}$ , and  $\beta > 0$ .*

*Proof.* Topological memory requires that (7) must be satisfied. Choose  $S_{\text{off}} > \gamma a_1(t)$  so that lower bound condition is satisfied. Since  $f$  is a continuous positive function for positive argument and  $S \geq S_{\text{off}}$  is positive and bounded then  $u_1(t)$  is positive and bounded. Hence,  $a_i(t)$  is positive and bounded and  $0 < s_j \leq 1$ .  $u_1^0$  from (5) is also positive. Hence, for any  $\gamma$ , (7) can be satisfied for sufficiently large  $\beta$ .  $\square$

**Remark 1.** *The piecewise square root gain function  $f(x) = \sqrt{\max(x, 0)}$  satisfies all the conditions for topological memory.*

We have thus established the conditions for topological memory. We must now examine the dynamics to probe the existence of intermittent rivalry. We consider the singular limit where the fatigue variables are much slower than the activity variables, i.e.  $\tau_a, \tau_s \gg \tau_u$ , and use a slow-fast time-scale

analysis. Without loss of generality, we rescale time such that  $\tau_u = 1$ . The activity variables are a fast subsystem while the fatigue variables comprise the slow subsystem. In the singular limit, we can examine the fast dynamics assuming that the slow variables are fixed.

At the initiation of the on-state,  $S(t)$  changes abruptly from  $S_{\text{off}}$  to  $S_{\text{on}}$  at which point the off-state fixed point no longer exists. The system will then evolve towards the asymmetric on-state fixed point. The pool that becomes dominant depends on which basin of attraction the off-state fixed point resides, i.e. which side of the separatrix the off-state lies on. We can compute the direction of the initial response to the on-state by linearizing around the off-state fixed point with  $u_i(t) = u_i^0 + v_i(t)$ . Using (4), the fast subsystem then obeys

$$\frac{dv_i}{dt} = A_i - v_i - f'_i(S_{\text{on}})\beta s_j v_j \quad (8)$$

where  $f_i(I) = f(I - s_j\beta u_j^0 - \gamma a_i)$ , and  $A_i = f_i(S_{\text{on}}) - f_i(S_{\text{off}})$ . Setting  $\tilde{\beta} = f'_i(S_{\text{on}})\beta s_j$  in (8) gives

$$\frac{dv_i}{dt} = A_i - v_i - \tilde{\beta}_j v_j \quad (9)$$

with initial conditions  $v_i(0) = 0$ . In matrix form, (9) is

$$\frac{dv}{dt} = A + Mv \quad (10)$$

where  $v = (v_1, v_2)'$ ,  $S = (A_1, A_2)'$  and

$$M = \begin{pmatrix} -1 & -\tilde{\beta}_2 \\ -\tilde{\beta}_1 & -1 \end{pmatrix} \quad (11)$$

The eigenvalues of  $M$  are  $\lambda_{\pm} = -1 \pm \sqrt{\tilde{\beta}_1 \tilde{\beta}_2}$  with eigenvectors

$$e_{\pm} = \left( 1, \mp \sqrt{\tilde{\beta}_1 / \tilde{\beta}_2} \right)' \quad (12)$$

respectively. We can diagonalize the system by operating on (10) with the inverse of the matrix of eigenvectors  $U = [e_+, e_-]$ :

$$U^{-1} = \frac{1}{2} \begin{pmatrix} 1 & -\sqrt{\tilde{\beta}_2 / \tilde{\beta}_1} \\ 1 & \sqrt{\tilde{\beta}_2 / \tilde{\beta}_1} \end{pmatrix} \quad (13)$$

to obtain

$$\frac{dv_{\pm}}{dt} = A_{\pm} + \lambda_{\pm}v_{\pm} \quad (14)$$

where

$$\begin{pmatrix} v_+ \\ v_- \end{pmatrix} = U^{-1} \begin{pmatrix} v_1 \\ v_2 \end{pmatrix}, \quad \begin{pmatrix} A_+ \\ A_- \end{pmatrix} = U^{-1} \begin{pmatrix} A_1 \\ A_2 \end{pmatrix} \quad (15)$$

and initial conditions are  $v_{\pm}(0) = 0$ . The solutions are

$$v_{\pm}(t) = \frac{A_{\pm}}{\lambda_{\pm}}(e^{\lambda_{\pm}t} - 1) \quad (16)$$

If  $\sqrt{\tilde{\beta}_1\tilde{\beta}_2} > 1$  then  $\lambda_+ > 1$  and  $v_+(t)$  will tend to either positive or negative infinity depending on the sign of  $A_+$ , while  $v_-(t)$  will approach zero. Hence, asymptotically for large  $t$ , we have

$$v_1(t) = v_+ + v_- \sim \frac{A_+}{\lambda_+}e^{\lambda_+t} \quad (17)$$

$$v_2(t) = \sqrt{\frac{\tilde{\beta}_1}{\tilde{\beta}_2}}(v_- - v_+) \sim -\sqrt{\frac{\tilde{\beta}_1}{\tilde{\beta}_2}}\frac{A_+}{\lambda_+}e^{\lambda_+t} \quad (18)$$

If  $A_+ > 0$  then population 1 will become dominant and if  $A_+ < 0$  then population 2 will be dominant.  $A_+ = \left(A_1 - \sqrt{\tilde{\beta}_2/\tilde{\beta}_1}A_2\right)/2$  is a function of the slow variables.

In order to prove the existence of intermittent rivalry, we need to examine how repeated on-states affect  $A_+$ . Let  $T_n$  represent the time of the  $n$ th on-state.  $A_+(T_n)$  changes on each on-state because of the change in the slow variables (i.e. fatigue processes). What we need to show is that the change of the slow variables is sufficient to cause  $A_+$  to alternate signs.

Consider first that the only slow process is local fatigue. We can then set

$s_1 = s_2 = 1$ . Let population 1 be dominant. Hence,

$$\begin{aligned}
2A_+(T_n) &= f(S_{\text{on}} - \gamma a_1(T_n)) - \sqrt{\frac{f'_1(S_{\text{on}})}{f'_2(S_{\text{on}})}} f(S_{\text{on}} - \beta u_1^0 - \gamma a_2(T_n)) \\
&\quad - f(S_{\text{off}} - \gamma a_1(T_n)) \\
&\equiv f_1(S_{\text{on}}) - \sqrt{\frac{f'_1(S_{\text{on}})}{f'_2(S_{\text{on}})}} f_2(S_{\text{on}}) - f_1(S_{\text{off}})
\end{aligned} \tag{19}$$

$$u_1^0(T_n) = f_1(S_{\text{off}}) \tag{20}$$

The following is essentially a restatement of Proposition 1 and 2:

**Corollary 2.** *There will be a WTA state where one pool is dominant (i.e.  $A_+ > 0$  in (19)) if  $f'' < 0$  on  $S > 0$  (concave) for some  $\tilde{\beta} > 0$ .*

*Proof.* We first note that  $f$  is a monotonically increasing function. Hence,  $f_1(S_{\text{on}}) > f_1(S_{\text{off}})$  and  $f_2(S_{\text{on}}) < f_1(S_{\text{on}})$ . If  $f''_i(S_{\text{on}}) < 0$  (i.e.  $f$  is concave) then  $f'_2(S_{\text{on}}) > f'_1(S_{\text{on}})$ . Since  $u_1^0 > 0$ ,  $f_2(S_{\text{on}})$  decreases as  $\beta$  increases and since  $f(0) = 0$  then  $f_2(S_{\text{on}}) = 0$  for  $\beta > 0$  sufficiently large. Hence, by continuity of  $f$ ,  $A_+ > 0$  for some  $\beta > 0$ .  $\square$

If  $f_i(S_{\text{on}})$  is not concave then it is possible that  $f'_2(S_{\text{on}}) < f'_1(S_{\text{on}})$  and thus depending on the precise shape of  $f$ , dominance may or may not be possible. Herein, we assume that  $f(x)$  is concave for  $x > 0$ . Thus even for a state with no asymmetry in the fatigue, any arbitrarily small initial asymmetry or noise will allow one population to be dominant while the other is suppressed. Dominance can also occur in the presence of local fatigue provided that  $a_2$  is sufficiently large and  $a_1$  is sufficiently small.

Intermittent rivalry will occur if  $A_+$  changes sign. Note that immediately after  $A_+$  reaches 0, there is a discontinuity in  $A_+$  since  $u_1^0 = 0$  and  $u_2^0 > 0$ . Thus, as long as  $A_+$  reaches zero and induces a switch, then the new dominance will be established and  $A_+$  will jump to a larger magnitude value. We thus need to prove that there is a strength of fatigue for which  $A_+$  will change signs and fatigue can attain that value. This is established in the following two lemmas.

**Lemma 1.** *If  $A_+ > 0$  initially, then  $A_+$  will become negative if  $a_1 \geq a_{\text{switch}} \equiv S_{\text{off}}/\gamma$ . i.e. A dominance switch will take place if the local fatigue amplitude becomes large enough.*

*Proof.* We analyze how  $A_+(T_n)$  changes as a function  $a_i$ . Because  $u_2^0 = 0$ , we can consider the effects of  $a_1$  and  $a_2$  independently. First consider  $a_1$ . Suppose that  $a_1$  is sufficiently small such that  $A_+ > 0$ . An increase of  $a_1$  causes  $f_1(S_{\text{on}})$  to decrease,  $f_1(S_{\text{off}})$  to decrease, and  $f_1'(S_{\text{on}})$  to increase by concavity of  $f$ . It also induces  $f_2(S_{\text{on}})$  to increase and  $f_2'(S_{\text{on}})$  to decrease through the decrease in  $u_1^0$ . Thus, the first two terms of (19) combine to decrease  $A_+$  but the third term increases  $A_+$ . For a concave function,  $f_1(S_{\text{on}}) - f_1(S_{\text{off}})$  increases with increasing  $a_1$  for  $f_1(S_{\text{off}}) > 0$ . Thus, a switch is guaranteed when  $a_1$  increases to the point that  $f_1(S_{\text{off}}) = 0$ , which occurs when  $S_{\text{off}} - \gamma a_1 \leq 0$  because for  $a_1 > a_2$ ,  $A_+ < 0$ , proving the lemma and showing that  $a_{\text{switch}} = S_{\text{off}}/\gamma$ .  $\square$

Note that the  $a_1$  threshold for  $f_1(S_{\text{off}}) = 0$  is independent of  $a_2$ . On the other hand, a decrease of  $a_2$  causes  $f_2(S_{\text{on}})$  to increase and  $f_2'(S_{\text{on}})$  to decrease. Thus, depending on the other parameters,  $a_2$  could induce a switch if it becomes small enough but this is not guaranteed.

In the singular limit,  $u_i(t)$  immediately approaches  $f(S_{\text{on}} - \gamma a_i)$  in the on-state and  $f(S_{\text{off}} - \gamma a_i)$  in the off state. Hence, from (2) it will increase towards  $f(S_{\text{on}} - \gamma a_i)$  in the on-state and relax back towards  $f(S_{\text{off}} - \gamma a_i)$  in the off-state. It will have a net increase after each frame presentation cycle if the increase during the on-state is greater than the decrease during the off-state. We show that this is possible in the following lemma.

**Lemma 2.** *For  $f(S_{\text{on}})$  large enough, which is achievable if  $f$  is nonsaturating and  $S_{\text{on}}$  is large enough, the local fatigue variable  $a_i$  can increase with each on-state until it exceeds  $a_{\text{switch}}$*

*Proof.* We need to show that starting from a zero initial condition  $a_1(t)$  can exceed  $a_{\text{switch}} = S_{\text{off}}/\gamma$ . The dynamics of the local fatigue variable  $a_i$  are given by (2). Over one period the net increase in  $a_i$  is

$$a_i(t+T) - a_i(t) = \frac{1}{\tau_a} (\langle u_i(t) \rangle - \langle a_i(t) \rangle) \geq \frac{1}{\tau_a} (\langle u_i(t) \rangle - a_{\text{switch}}T) \quad (21)$$

where  $\langle \cdot \rangle = \int_t^{t+T} \cdot dt'$ . Thus, as long as  $\langle u_i \rangle > a_{\text{switch}}T$  then  $a_i(t)$  will increase with each on-state until it exceeds  $a_{\text{switch}}$ .

From (1) we obtain

$$\begin{aligned} \langle u_i \rangle &= -u_i(t+T) + u_i(t) + \langle f(S(t) - \gamma a_i) \rangle \\ &\geq -u_i(t+T) + u_i(t) + \langle f(S(t) - \gamma a_{\text{switch}}) \rangle \end{aligned} \quad (22)$$

and  $\langle f(S(t) - \gamma a_{\text{switch}}) \rangle = T_{\text{on}} f(S_{\text{on}} - \gamma a_{\text{switch}}) + T_{\text{off}} f(S_{\text{off}} - \gamma a_{\text{switch}})$ . We now need to estimate  $u_i(t) - u_i(t + T)$ . For  $u_i$  dominant, the activity dynamics are

$$\frac{du_i}{dt'} = -u_i + f(S_{\text{on}} - \gamma a_i(t')), \quad t \leq t' \leq t + T_{\text{on}} \quad (23)$$

$$\frac{du_i}{dt'} = -u_i + f(S_{\text{off}} - \gamma a_i(t')), \quad t + T_{\text{off}} < t' \leq t + T \quad (24)$$

Hence,  $u_i(t)$  obeys

$$\begin{aligned} u_i(t + T_{\text{on}}) &= u_i(t) e^{-T_{\text{on}}} + \int_t^{t+T_{\text{on}}} e^{-(t+T_{\text{on}}-s)} f(S_{\text{on}} - \gamma a_i(s)) ds \\ &\leq u_i(t) e^{-T_{\text{on}}} + f(S_{\text{on}})(1 - e^{-T_{\text{on}}}) \\ u_i(t + T) &= u_i(t + T_{\text{on}}) e^{-T_{\text{off}}} + \int_{t+T_{\text{on}}}^{t+T} e^{-(t+T-s)} f(S_{\text{off}} - \gamma a_i(s)) ds \\ &\leq u_i(t) e^{-T} + f(S_{\text{on}})(1 - e^{-T_{\text{on}}}) e^{-T_{\text{off}}} + f(S_{\text{off}})(1 - e^{-T_{\text{off}}}) \end{aligned}$$

Yielding

$$\begin{aligned} u_i(t) - u_i(t + T) &\geq u_i(t) (1 - e^{-T}) - f(S_{\text{on}})(e^{-T_{\text{off}}} - e^{-T}) - f(S_{\text{off}})(1 - e^{-T_{\text{off}}}) \\ &\geq -(f(S_{\text{on}}) - f(S_{\text{off}}))(e^{-T_{\text{off}}} - e^{-T}) \end{aligned}$$

since  $u_i(t) \geq f(S_{\text{off}})$ . Thus, the condition for  $a_i$  to increase beyond  $a_{\text{switch}}$  is

$$\begin{aligned} \langle u_i \rangle &\geq -(f(S_{\text{on}}) - f(S_{\text{off}}))(1 - e^{-T_{\text{on}}}) e^{-T_{\text{off}}} \\ &\quad + T_{\text{on}} f(S_{\text{on}} - \gamma a_{\text{switch}}) + T_{\text{off}} f(S_{\text{off}} - \gamma a_{\text{switch}}) \geq a_{\text{switch}} T \end{aligned}$$

However, since  $a_{\text{switch}} = S_{\text{off}}/\gamma$  and  $f(0) = 0$  this is

$$\langle u_i \rangle \geq -(f(S_{\text{on}}) - f(S_{\text{off}}))(1 - e^{-T_{\text{on}}}) e^{-T_{\text{off}}} + T_{\text{on}} f(S_{\text{on}} - S_{\text{off}}) \geq a_{\text{switch}} T$$

By concavity  $f(S_{\text{on}} - S_{\text{off}}) \geq f(S_{\text{on}}) - f(S_{\text{off}})$  and thus

$$\begin{aligned} \langle u_i \rangle &\geq (f(S_{\text{on}}) - f(S_{\text{off}}))(T_{\text{on}} - (1 - e^{-T_{\text{on}}}) e^{-T_{\text{off}}}) \geq a_{\text{switch}} T \\ &\geq (f(S_{\text{on}}) - f(S_{\text{off}})) T_{\text{on}} (1 - e^{-T_{\text{off}}}) \geq a_{\text{switch}} T \end{aligned}$$

can be satisfied for  $f(S_{\text{on}})$  sufficiently large.  $\square$

We now have all the pieces to establish when intermittent rivalry is possible. For intermittent rivalry,  $\beta$  must be sufficiently large such that the on-state is WTA. Consider the first epoch where  $A_+ > 0$  (pool 1 is dominant) and both  $a_1$  and  $a_2$  are initially zero. Then by Lemmas 1 and 2,  $A_+$  will become negative and dominance will switch. In the second epoch, pool 2 is dominant and 1 is suppressed. However, we can still use equation (19) by exchanging the indices. Epoch 2 differs from epoch 1 in that  $a_1$  is now at a high value while  $a_2$  is at a lower value. Thus  $a_1$  will decrease while  $a_2$  will increase. The switch will occur when  $A_+ \leq 0^-$ . This occurs when  $a_2$  reaches the  $a_{\text{switch}}$ , which is guaranteed by Lemmas 1 and 2. Intermittent rivalry will then ensue.

We now consider the dependence of dominance time on frame presentation period. In the quartet illusion,  $T_{\text{on}}$  is fixed and  $T_{\text{off}}$  is changed. We obtain the following result.

**Theorem 3.** *Dominance time increases nonlinearly with  $T_{\text{off}}$ .*

*Proof.* The dominance time is given by the time it takes  $a_i$  to reach  $a_{\text{switch}}$ . During the on-state,  $u_i$  increases towards  $f(S_{\text{on}} - \gamma a_i)$  and relaxes towards  $f(S_{\text{off}} - \gamma a_i)$  during the off-state. In the singular limit, it attains its maximum  $u_{\text{max}}(t)$  at the end of the on-state, and its minimum  $u_{\text{min}}(t)$  at the end of the off-state. Similarly,  $a_i$  increases towards  $u_{\text{max}}(t)$  during the on-state and relaxes towards  $u_{\text{min}}(t)$  during the off-state. However, by Lemma 2,  $a_i$  will become progressively larger after each cycle. Let  $t$  be the time at the end of some off-state. Then after one frame presentation period,  $a_i$  has the value

$$a_i(t + T) = a_i(t)e^{-T} + \int_t^{t+T_{\text{on}}} e^{-(t+T-s)} u(s) ds + \int_{t+T_{\text{on}}}^{t+T} e^{-(t+T-s)} u(s) ds$$

which has derivative

$$\begin{aligned} \frac{da_i(t + T)}{dT_{\text{off}}} &= -a_i(t)e^{-T} - e^{-T_{\text{off}}} \int_t^{t+T_{\text{on}}} e^{-(t+T_{\text{on}}-s)} u(s) ds + u(t + T) \\ &\quad - \int_{t+T_{\text{on}}}^{t+T} e^{-(t+T-s)} u(s) ds \end{aligned} \tag{25}$$

$u(t)$  is decreasing during the off-state so its minimum is  $u(t + T)$ . Thus

$$\frac{da_i(t + T)}{dT_{\text{off}}} \leq -a_i(t)e^{-T} - e^{-T_{\text{off}}} \int_t^{t+T_{\text{on}}} e^{-(t+T_{\text{on}}-s)} u(s) ds + u(t + T)e^{-T_{\text{off}}}$$



which is always negative since  $a_i > u(t - T)$ . Hence,  $a_i(t + T)$  will become smaller as  $T_{\text{off}}$  becomes larger. This then implies that it will take more frame presentation cycles to reach  $a_{\text{switch}}$  and thus increase the dominance time with increasing  $T_{\text{off}}$ . The increase will also be nonlinear (faster than exponential) in  $T_{\text{off}}$ .  $\square$

**Remark 2.** *The mechanism for intermittent rivalry could be considered to be release but it differs from release in static rivalry. Increased presentation frequency will induce faster switches because it causes  $a_i$  to increase faster. Reduced amplitude of pulses will also increase dominance period because it takes longer to reach threshold. Thus intermittent release is like escape for static rivalry, which implies Levelt's second proposition. It can also coexist with escape for static rivalry in the same model.*

**Remark 3.** *Similar arguments can be applied to show that intermittent rivalry is possible with cross-pool synaptic depression.*

We now consider the conditions that allow for slow habituation. Let the dominant and suppressed populations be labeled by  $D$  and  $S$  respectively. We show that the observed habituation of decreasing dominance times can occur if switches are always induced by the adaptation variable  $a_D$  reaching the threshold  $a_{\text{switch}}$ . The first epoch is caused by  $a_D$  reaching threshold starting from zero, and the second epoch is caused by  $a_D$  reaching the same threshold from a small number. Hence, the dominance times of the first and second epochs will always be similar. However, from the dynamics of (2) we see that the rate of increase in  $a_D$  slows linearly as  $a_D$  increases. Similarly, the rate of decrease of  $a_S$  also slows linearly as  $a_S$  decreases. Thus as long as the saturated value of  $a_D$  is greater than  $a_{\text{switch}}$  then  $a_D$  will reach threshold faster than  $a_S$  will decay to near zero. This implies that during the second epoch,  $a_S$  (which was the previously dominant population) does not decrease all the way to its initial value in the time it takes (the new)  $a_D$  to reach threshold. Thus, for the third epoch, the time it takes  $a_D$  to reach threshold will be shorter than the previous two epochs because it starts at a higher value. This will also occur for subsequent epochs and the decay value of  $a_S$  will get progressively larger and thus shorten the dominance time. This will eventually reach steady state where  $a_S$  is large enough such that it always relaxes back to the same state.

Now consider the case where there is depression but no adaptation. We again assume that population 1 is dominant. In this case, we can set  $a_i = 0$

and obtain

$$2A_+ = f(S_{\text{on}}) - f(S_{\text{off}}) - \sqrt{\frac{f'_1(S_{\text{on}})s_2(T_n)}{f'_2(S_{\text{on}})s_1(T_n)}}} f(S_{\text{on}} - s_2(T_n)\beta u_1^0) \quad (26)$$

In depression,  $s_1$  decreases while  $s_2$  increases, except for the first epoch if the initial conditions are  $s_1 = s_2 = 1$ . Increasing  $s_2$  decreases  $f_2(S_{\text{on}})$  while increasing  $f'_2(S_{\text{on}})$  but because  $u_1^0$  is very small, these changes are small. Hence, the main effect of  $s_2$  is to increase the square root factor of the third term of (26) by its presence in the numerator. Conversely, decreasing  $s_1$  increases this factor through the denominator. Hence, both of these processes serve to increase the third term and switching is possible for sufficiently strong depression. We can represent the switch condition, given by  $A_+ = 0$ , as

$$\sqrt{\frac{s_2(T_n)}{s_1(T_n)}} = \frac{f(S_{\text{on}}) - u_1^0}{f(S_{\text{on}} - s_2\beta u_1^0)} \sqrt{\frac{f'(S_{\text{on}} - s_2\beta u_1^0)}{f'(S_{\text{on}})}} \quad (27)$$

by rearranging (26). If  $f(S_{\text{off}}) = u_1^0 \ll f(S_{\text{on}})$ ,  $s_2 \leq 1$ ,  $f'(S_{\text{on}})s_2\beta \geq 1$ ,  $|f'(S_{\text{on}})/f(S_{\text{on}})| \sim O(1)$ ,  $|f'(S_{\text{on}})/f''(S_{\text{on}})| \sim O(1)$ , and  $f''(S_{\text{on}}) < 0$ , we can Taylor expand to obtain

$$\begin{aligned} \sqrt{\frac{s_2(T_n)}{s_1(T_n)}} &= \frac{f(S_{\text{on}}) - u_1^0}{f(S_{\text{on}}) - f'(S_{\text{on}})s_2\beta u_1^0} \sqrt{\frac{f'(S_{\text{on}}) - f''(S_{\text{on}})s_2\beta u_1^0}{f'(S_{\text{on}})}} \\ &= 1 + Cu_1^0 + O((u_1^0)^2) \end{aligned} \quad (28)$$

where  $C > 0$  is  $O(1)$ .

In the first epoch,  $s_1$  decreases from 1 while  $s_2$  remains near 1. From (28), we see that dominance will switch when  $s_1$  decreases to a threshold  $\theta = 1 - 2Cu_1^0 + O((u_1^0)^2)$ . In the second epoch, population 1 is now suppressed and  $s_1$  will relax back to 1, while  $s_2$  will begin to decrease from 1. The threshold condition is given by (28) but with the indices reversed. Since  $s_1 = \theta$  is  $2Cu_1^0$  less than 1,  $s_2$  will take longer to decrease to threshold than  $s_1$  in the first epoch. Hence, the dominance time of the second epoch will be longer than the first. In the third epoch,  $s_1$  starts very near 1 (within much less than order  $u_1^0$ ) and decreases while  $s_2$  is order  $u_1^0$  below 1 and increases towards 1. Hence,  $s_1$  and  $s_2$  will start in positions very near (much less than order  $u_1^0$ ) from where they were in the second epoch. Thus, the dominance time will be almost the same as in epoch two and this will hold for subsequent epochs. These results are summarized in the following propositions.

**Proposition 1.** *Slow habituation occurs for local fatigue if the time constant is sufficiently long.*

**Proposition 2.** *Slow habituation will not arise for cross-pool depression.*
